# Supplementary material for: Wheat litter and feed with aluminosilicates for improved growth and meat quality in broiler chickens
Source: PeerJ. 2021 Aug 4;9:e11918. doi: 10.7717/peerj.11918 (PMC8349159; doi:10.7717/peerj.11918)
Supplement: Supplemental Information 2 [file peerj-09-11918-s002.xlsx]

## Sheet: growth performance
group	replicate	no.	STARTER	GROWER 1	GROWER 2	finiszer	slaughter day	group	replicate	count of birds in pen. 1-13	LP. 14-21	LP 22-42	LP Finiszer	slaughter day	% survivability	weight starter	weight grower 1	weight grower 2	weight fishier	weight slaughter day	feed intake starter	Feed Intake GROWER 1	Feed Intake GROWER 2	Feed Intake FINISZER	FI TOTAL	BWG 1-13	BWG 14-21	BWG 22-36	BWG FINISZER	BWG TOTAL	FI 1-13	FI 14-21	FI 22-42	FI FINISZER	FI TOTAL	FCR 1-13	FCR 14-21	FCR 22-42	FCR FINISZER	FCR TOTAL
I	1	1	37	335	975	2240	2560	I	1	10	10	10	10	10	100	37	309	927.7	2058	2472	2894	10000	17750	8700	39344	272	618.7	1130.3	414	2435	289.4	1000	1775	870	3934.4	1.06397	1.61629	1.57038	2.10145	1.61577
I		2	35	318	1025	1960	2440	I	2	10	10	10	9	8	80	36.5	329.5	1033.9	2262.22	2790	3196	10000	17900	8280	39376	293	704.4	1228.32	527.778	2753.5	319.6	1000	1988.89	920	4922	1.09078	1.41965	1.61919	1.74316	1.78754
I		3	37	254	832	2000	2660	I	3	10	10	10	9	9	90	36.4	332.5	1025.2	2095.56	2684.44	3229	10000	16800	8040	38069	296.1	692.7	1070.36	588.889	2648.04	322.9	1000	1866.67	893.333	4229.89	1.09051	1.44363	1.74397	1.51698	1.59736
I		4	36	363	887	2220	2200	I	4	10	10	10	10	10	100	36.1	335.2	1047.6	2120	2506	3047	10000	18100	8360	39507	299.1	712.4	1072.4	386	2469.9	304.7	1000	1810	836	3950.7	1.01872	1.40371	1.6878	2.1658	1.59954
I		5	36	340	843	2040	2660	I	5	10	10	10	10	10	100	37.1	331.1	968.1	2105	2596	3288	10000	18500	g	31788	294	637	1136.9	491	2558.9	328.8	1000	1850	#VALUE!	3178.8	1.11837	1.56986	1.62723	#VALUE!	1.24225
I		6	43	292	897	2200	2360	I	6	10	10	10	10	10	100	36.2	311.5	944.7	2044	2438	3141	10000	17600	8400	39141	275.3	633.2	1099.3	394	2401.8	314.1	1000	1760	840	3914.1	1.14094	1.57928	1.60102	2.13198	1.62965
I		7	37	240	1011	1840	2580	I	7	10	9	9	9	8	80	35.3	338	1071.89	2224.44	2730	3055	10000	17600	7620	38275	302.7	733.889	1152.56	505.556	2694.7	305.5	1111.11	1955.56	846.667	4784.38	1.00925	1.514	1.69671	1.67473	1.77548
I		8	39	317	1056	1760	2380	I	8	10	10	10	9	9	90	37	309.8	941.1	2195.56	2706.67	3111	10000	18100	8680	39891	272.8	631.3	1254.46	511.111	2669.67	311.1	1000	2011.11	964.444	4432.33	1.1404	1.58403	1.60317	1.88696	1.66026
I		9	36	305	761	2020	2840	I	9	10	10	10	10	9	90	36.8	350.8	1090.1	2152	2442.22	3506	10000	17900	5360	36766	314	739.3	1061.9	290.222	2405.42	350.6	1000	1790	536	4085.11	1.11656	1.35263	1.68566	1.84686	1.69829
I		10	34	326	990	2300	2040	I	10	10	10	10	9	8	80	36.4	343.5	1102.9	2215	2675	3107	10000	18100	7600	38807	307.1	759.4	1112.1	460	2638.6	310.7	1000	2011.11	844.444	4850.88	1.01172	1.31683	1.80839	1.83575	1.83843
I	2	1	39	310	1093	2160	2760	II	11	10	10	10	10	10	100	34.1	307.3	1031.7	2210	2822	3134	10000	21480	7560	42174	273.2	724.4	1178.3	612	2787.9	313.4	1000	2148	756	4217.4	1.14714	1.38045	1.82297	1.23529	1.51275
I		2	36	314	927	2080	2620	II	12	10	10	10	10	10	100	36.2	343.2	1044.6	2362	2874	3424	10000	21600	8180	43204	307	701.4	1317.4	512	2837.8	342.4	1000	2160	818	4320.4	1.11531	1.42572	1.63959	1.59766	1.52245
I		3	41	310	997	2300	2940	II	13	10	10	10	10	10	100	35.6	353.2	1123.4	2476	2948	3407	10000	22060	8180	43647	317.6	770.2	1352.6	472	2912.4	340.7	1000	2206	818	4364.7	1.07273	1.29836	1.63093	1.73305	1.49866
I		4	35	350	983	2220	3040	II	14	10	10	9	9	9	90	36.9	348.8	1131	2504.44	3075.56	3422	10000	19600	8440	41462	311.9	782.2	1373.44	571.111	3038.66	342.2	1000	2177.78	937.778	4606.89	1.09715	1.27845	1.58563	1.64202	1.51609
I		5	33	316	1017	2080	2740	II	15	10	10	10	10	10	100	34.9	334.7	1109.6	2402	2916	3135	10000	22100	8220	43455	299.8	774.9	1292.4	514	2881.1	313.5	1000	2210	822	4345.5	1.0457	1.29049	1.71	1.59922	1.50828
I		6	37	342	1022	2360	3120	II	16	10	10	10	9	9	90	35.2	337.8	1102.6	2240	2922.22	3415	10000	22340	9240	44995	302.6	764.8	1137.4	682.222	2887.02	341.5	1000	2482.22	1026.67	4999.44	1.12855	1.30753	2.18237	1.50489	1.7317
I		7	39	333	1095	2380	2760	II	17	10	9	9	9	9	90	35.3	349.778	1171.56	2546.67	2977.78	2636	10000	21340	8060	42036	314.478	821.778	1375.11	431.111	2942.48	263.6	1111.11	2371.11	895.556	4670.67	0.838215	1.35208	1.72431	2.07732	1.58732
I		8	38	330	1112	2300	2340	II	18	10	10	10	10	10	100	36.3	350.7	1124.1	2494	2868	3282	10000	21380	9000	43662	314.4	773.4	1369.9	374	2831.7	328.2	1000	2138	900	4366.2	1.04389	1.29299	1.5607	2.40642	1.5419
I		9	30	350	1101	2480	0	II	19	10	9	9	9	9	90	36.4	300.3	1112	2371.11	2915.56	2899	10000	21920	7500	42319	263.9	811.7	1259.11	544.444	2879.16	289.9	1111.11	2435.56	833.333	4702.11	1.09852	1.36887	1.93435	1.53061	1.63316
I		10	37	340	992	0	0	II	20	10	10	10	9	9	90	35.9	351.5	1120.1	2504.44	2851.11	3436	10000	21900	7900	43236	315.6	768.6	1384.34	346.667	2815.21	343.6	1000	2433.33	877.778	4804	1.08872	1.30107	1.75775	2.53205	1.70644
I	3	1	39	400	1044	2140	2360	III	21	10	10	10	10	10	100	37.1	350.6	1117.2	2476	3070	3427	10000	21620	11360	46407	313.5	766.6	1358.8	594	3032.9	342.7	1000	2162	1136	4640.7	1.09314	1.30446	1.59111	1.91246	1.53012
I		2	39	333	1087	2020	3680	III	22	10	10	10	9	8	80	36.7	344.8	1142.5	2500	3092.5	3471	10000	20050	8600	42121	308.1	797.7	1357.5	592.5	3055.8	347.1	1000	2227.78	955.556	5265.12	1.12658	1.2536	1.64109	1.61275	1.72299
I		3	30	314	1056	2280	2540	III	23	10	10	10	10	10	100	36.6	348.8	1126.7	2344	2978	3536	10000	21920	11180	46636	312.2	777.9	1217.3	634	2941.4	353.6	1000	2192	1118	4663.6	1.13261	1.28551	1.80071	1.76341	1.5855
I		4	39	360	954	2320	2160	III	24	10	10	10	10	9	90	36.3	321.6	1148	2370	3068.89	3159	10000	20480	9400	43039	285.3	826.4	1222	698.889	3032.59	315.9	1000	2048	940	4782.11	1.10726	1.21007	1.67594	1.34499	1.57691
I		5	42	260	875	2260	2420	III	25	10	10	10	10	10	100	34.4	334.1	1153.1	2548	3136	3325	10000	21720	12000	47045	299.7	819	1394.9	588	3101.6	332.5	1000	2172	1200	4704.5	1.10944	1.221	1.5571	2.04082	1.5168
I		6	38	355	1062	1920	2900	III	26	10	9	9	9	9	90	37.3	354.333	1168	2640	2951.11	3239	10000	20220	10050	43509	317.033	813.667	1472	311.111	2913.81	323.9	1111.11	2246.67	1116.67	4834.33	1.02166	1.36556	1.52627	3.58929	1.65911
I		7	32	312	1027	1880	2440	III	27	10	10	9	9	9	90	36.8	351.5	1116.89	2526.67	2953.33	3418	10000	20080	10080	43578	314.7	765.389	1409.78	426.667	2916.53	341.8	1000	2231.11	1120	4842	1.08611	1.30653	1.5826	2.625	1.66019
I		8	36	314	1137	2020	2820	III	28	10	10	10	10	10	100	35.8	348.3	1105.1	2453	3124	3559	10000	21600	12000	47159	312.5	756.8	1347.9	671	3088.2	355.9	1000	2160	1200	4715.9	1.13888	1.32135	1.60249	1.78838	1.52707
I		9	34	344	1036	2020	2840	III	29	10	10	10	10	10	100	36.6	350.2	1156	2546	3200	3465	10000	22120	11980	47565	313.6	805.8	1390	654	3163.4	346.5	1000	2212	1198	4756.5	1.10491	1.241	1.59137	1.8318	1.5036
I		10	35	333	974	0	0	III	30	10	10	10	10	10	100	35.6	350.3	1156.3	2558	3041	3365	10000	21960	9940	45265	314.7	806	1401.7	483	3005.4	336.5	1000	2196	994	4526.5	1.06927	1.24069	1.56667	2.05797	1.50612
I	4	1	35	345	1062	2500	2700	IV	31	10	9	9	9	9	90	36.4	331	1111.11	2493.33	3088.89	2786	10000	20440	9970	43196	294.6	780.111	1382.22	595.556	3052.49	278.6	1111.11	2271.11	1107.78	4799.56	0.945689	1.4243	1.64309	1.86007	1.57234
I		2	36	342	1083	1940	3120	IV	32	10	10	10	9	9	90	36.4	349	1128.5	2515.56	3140	3406	10000	21040	9300	43746	312.6	779.5	1387.06	624.444	3103.6	340.6	1000	2337.78	1033.33	4860.67	1.08957	1.28287	1.68542	1.6548	1.56614
I		3	32	361	981	1960	2360	IV	33	10	10	10	10	10	100	37.3	361.2	1081.5	2562	3178	2986	10000	22460	11280	46726	323.9	720.3	1480.5	616	3140.7	298.6	1000	2246	1128	4672.6	0.921889	1.38831	1.51706	1.83117	1.48776
I		4	43	358	1036	1800	2780	IV	34	10	10	10	10	10	100	34.8	338.1	1081.3	2512	3058	3498	10000	22600	11180	47278	303.3	743.2	1430.7	546	3023.2	349.8	1000	2260	1118	4727.8	1.15331	1.34553	1.57965	2.04762	1.56384
I		5	35	273	1142	2320	2240	IV	35	10	9	8	7	7	70	37.3	345.222	1024	2608.57	3188.57	3145	10000	20100	8840	42085	307.922	678.778	1584.57	580	3151.27	314.5	1111.11	2871.43	1262.86	6012.14	1.02136	1.63693	1.81212	2.17734	1.90785
I		6	33	368	1119	2260	2820	IV	36	10	10	9	9	8	80	36.6	339.4	1073.89	2484.44	3045	2912	10000	20400	8340	41652	302.8	734.489	1410.56	560.556	3008.4	291.2	1000	2266.67	926.667	5206.5	0.961691	1.36149	1.60693	1.65312	1.73065
I		7	34	300	1071	2200	1920	IV	37	10	10	10	10	10	100	36.4	359.9	1156.7	2484	3036	3319	10000	21880	10640	45839	323.5	796.8	1327.3	552	2999.6	331.9	1000	2188	1064	4583.9	1.02597	1.25502	1.64846	1.92754	1.52817
I		8	38	345	987	2360	2700	IV	38	10	10	10	9	9	90	36.9	349.4	1075.9	2542.22	2864.44	3560	10000	22280	11160	47000	312.5	726.5	1466.32	322.222	2827.54	356	1000	2475.56	1240	5222.22	1.1392	1.37646	1.68828	3.84828	1.84691
I		9	35	314	1081	2040	1920	IV	39	10	9	9	9	9	90	37.5	336.889	1012.33	2458.89	2971.11	3296	10000	20100	10120	43516	299.389	675.444	1446.56	512.222	2933.61	329.6	1111.11	2233.33	1124.44	4835.11	1.10091	1.64501	1.5439	2.19523	1.64818
I		10	40	346	914	1820	2500	IV	40	10	10	10	10	9	90	37.1	342.6	1283.3	2350	2848.89	3569	10000	19800	9800	43169	305.5	940.7	1066.7	498.889	2811.79	356.9	1000	1980	980	4796.56	1.16825	1.06304	1.85619	1.96437	1.70587
I	5	1	38	333	992	2160	2600	V	41	10	10	10	10	9	90	38.1	356.3	1082.5	2390	2875.56	3312	10000	20080	9280	42672	318.2	726.2	1307.5	485.556	2837.46	331.2	1000	2008	928	4741.33	1.04085	1.37703	1.53576	1.91121	1.67098
I		2	37	330	947	2140	2080	V	42	10	10	10	10	9	90	35.4	312.7	1022.7	2336	3013.33	3280	10000	19480	9900	42660	277.3	710	1313.3	677.333	2977.93	328	1000	1948	990	4740	1.18283	1.40845	1.48329	1.46161	1.59171
I		3	39	359	914	2280	2620	V	43	10	9	9	9	9	90	36.7	342.333	1055.67	2491.11	2897.78	3116	10000	19250	9400	41766	305.633	713.333	1435.44	406.667	2861.08	311.6	1111.11	2138.89	1044.44	4640.67	1.01952	1.55763	1.49005	2.56831	1.622
I		4	37	320	897	1870	2720	V	44	10	10	10	9	9	90	36.4	348.5	1020.1	2448.89	2920	3541	10000	19500	10600	43641	312.1	671.6	1428.79	471.111	2883.6	354.1	1000	2166.67	1177.78	4849	1.13457	1.48898	1.51644	2.5	1.68158
I		5	34	370	1043	1960	2620	V	45	10	10	10	10	10	100	37.9	342.8	987.5	2419	2970	3405	10000	19820	10220	43445	304.9	644.7	1431.5	551	2932.1	340.5	1000	1982	1022	4344.5	1.11676	1.55111	1.38456	1.85481	1.4817
I		6	39	332	930	2260	2880	V	46	10	10	10	10	10	100	37.2	351.2	977.7	2470	2906	3526	10000	19840	9840	43206	314	626.5	1492.3	436	2868.8	352.6	1000	1984	984	4320.6	1.12293	1.59617	1.32949	2.25688	1.50607
I		7	35	305	1121	2120	2520	V	47	10	10	10	10	10	100	36.4	278.7	993.5	2236	2818	3380	10000	19000	9760	42140	242.3	714.8	1242.5	582	2781.6	338	1000	1900	976	4214	1.39496	1.39899	1.52918	1.67698	1.51496
I		8	41	289	880	2240	2720	V	48	10	10	10	10	10	100	36.1	335.3	1044.7	1913	2858	3269	10000	20420	9720	43409	299.2	709.4	868.3	945	2821.9	326.9	1000	2042	972	4340.9	1.09258	1.40964	2.35172	1.02857	1.53829
I		9	36	343	937	2040	2460	V	49	10	10	10	10	10	100	37.4	324.1	1045.5	2382	2806	3234	10000	19220	10220	42674	286.7	721.4	1336.5	424	2768.6	323.4	1000	1922	1022	4267.4	1.12801	1.38619	1.43808	2.41038	1.54136
I		10	35	330	1020	1980	2740	V	50	10	10	10	10	10	100	36	318.3	971.3	2334	2866	3224	10000	18860	10000	42084	282.3	653	1362.7	532	2830	322.4	1000	1886	1000	4208.4	1.14205	1.53139	1.38402	1.8797	1.48707
I	6	1	37	310	840	1880	2740
I		2	35	380	1027	1960	2760
I		3	40	300	976	1860	2920
I		4	35	313	857	1920	2240
I		5	39	310	1044	1860	2240
I		6	35	326	944	2400	2360
I		7	36	312	945	2200	2220
I		8	40	290	965	2020	2320
I		9	32	268	972	2360	2360
I		10	33	306	877	1980	2220
I	7	1	37	326	1134	2280	2780
I		2	34	343	1097	2160	2720
I		3	40	360	1057	2180	2480
I		4	37	397	1173	2240	2600
I		5	36	340	976	2020	2960
I		6	33	298	990	2400	2680
I		7	35	343	1025	2140	2600
I		8	34	350	1042	2200	3020
I		9	33	285	1153	2400	0
I		10	34	0	0	0	0
I	8	1	35	313	926	2340	2700
I		2	39	361	1024	2160	2300
I		3	37	290	929	2360	2720
I		4	39	365	1044	2320	2920
I		5	37	335	1025	2200	2880
I		6	40	320	926	1900	2960
I		7	42	235	801	2220	2400
I		8	32	287	1076	2000	2660
I		9	34	292	870	2260	2820
I		10	35	300	790	0	0
I	9	1	42	348	1124	2220	2140
I		2	33	357	1174	2000	2820
I		3	35	330	1098	2320	2480
I		4	33	330	1054	2080	2240
I		5	36	349	1137	2060	2500
I		6	35	392	1078	2320	2600
I		7	38	391	1045	2280	2080
I		8	36	330	997	1980	2320
I		9	43	360	1031	2400	2800
I		10	37	321	1163	1860	0
I	10	1	34	344	973	2040	2540
I		2	36	360	1215	2400	2880
I		3	43	387	1174	2460	2540
I		4	34	301	1131	1920	2920
I		5	35	403	1024	2500	3020
I		6	36	345	1060	2220	2940
I		7	35	343	1175	2160	2380
I		8	38	325	1032	2020	2180
I		9	40	347	1214	0	0
I		10	33	280	1031	0	0
II	11	1	37	293	946	2340	2860
II		2	35	273	1204	1900	2100
II		3	33	328	1016	2680	2900
II		4	37	283	947	2260	1960
II		5	32	317	927	2380	3120
II		6	33	337	994	2540	3020
II		7	33	335	1115	1880	3120
II		8	33	346	1030	1380	2840
II		9	36	260	1082	2380	3340
II		10	32	301	1056	2360	2960
II	12	1	36	345	1059	2380	2880
II		2	38	348	973	2420	2760
II		3	35	312	1123	2460	2960
II		4	36	356	1124	2360	2960
II		5	33	339	1034	2660	3320
II		6	37	377	1085	2540	2220
II		7	40	379	991	2440	3160
II		8	36	320	1021	2360	3240
II		9	36	335	1049	2300	2760
II		10	35	321	987	1700	2480
II	13	1	40	335	1077	2380	2720
II		2	34	339	1144	2700	2940
II		3	38	347	1166	2520	3140
II		4	36	367	1153	2580	3140
II		5	35	372	1038	2040	3060
II		6	33	316	954	2660	3160
II		7	32	375	1177	2400	2620
II		8	35	377	1202	2380	3020
II		9	31	393	1109	2520	2840
II		10	42	311	1214	2580	2840
II	14	1	36	380	1126	2120	3180
II		2	41	347	1269	2600	2540
II		3	33	338	1179	2260	3200
II		4	39	328	1062	2640	2880
II		5	37	310	1084	2660	2940
II		6	39	359	1162	2640	3100
II		7	41	358	1098	2460	3300
II		8	35	364	1150	2700	3120
II		9	36	322	1049	2460	3420
II		10	32	382	0	0	0
II	15	1	32	357	1033	2320	3020
II		2	36	305	1086	1980	3440
II		3	37	365	1128	2340	2260
II		4	36	307	1240	2680	3100
II		5	36	316	951	2660	3000
II		6	37	352	1237	2780	3360
II		7	35	331	1213	2240	2760
II		8	33	342	987	2400	2680
II		9	34	373	1053	2220	2820
II		10	33	299	1168	2400	2720
II	16	1	42	320	1074	2300	2820
II		2	33	330	1075	2200	2740
II		3	35	380	1064	2020	2860
II		4	35	327	1197	2300	2960
II		5	34	380	1012	2200	2980
II		6	32	360	1217	2340	2960
II		7	38	350	1019	2300	3020
II		8	34	323	1141	2180	2860
II		9	34	315	1062	2320	3100
II		10	35	293	1165	0	0
II	17	1	35	341	1136	2520	2840
II		2	38	350	1237	2700	2720
II		3	33	320	1178	2620	2860
II		4	34	354	1218	2580	3060
II		5	37	360	1262	2400	3100
II		6	37	377	1011	2880	3260
II		7	36	316	1153	2560	2400
II		8	37	360	1264	2000	3220
II		9	34	370	1085	2660	3340
II		10	32	0	0	0	0
II	18	1	38	310	1157	2400	2960
II		2	37	380	1047	2500	2940
II		3	36	360	1013	2680	3060
II		4	32	330	1023	2260	3200
II		5	37	350	1141	2500	2920
II		6	35	357	1172	2600	2180
II		7	37	350	1164	2480	2840
II		8	37	340	1155	2660	2940
II		9	34	360	1187	2240	2800
II		10	40	370	1182	2620	2840
II	19	1	39	270	919	2200	2240
II		2	36	261	1224	2700	3020
II		3	39	327	1126	2440	3120
II		4	32	330	1071	2500	2760
II		5	40	360	1162	2140	2800
II		6	37	375	965	2260	2860
II		7	35	380	1093	2500	3160
II		8	33	340	1205	2440	3120
II		9	36	360	1243	2160	3160
II		10	37	0	0	0	0
II	20	1	39	377	1053	2420	2800
II		2	31	377	1090	2300	2600
II		3	37	317	1111	2220	2560
II		4	35	345	1142	2700	3140
II		5	33	340	1153	2840	3040
II		6	34	362	1098	2680	2920
II		7	42	370	1183	2260	2960
II		8	37	355	994	2520	3260
II		9	36	293	1141	2600	2380
II		10	35	379	1236	0	0
III	21	1	32	349	1143	2320	3100
III		2	42	333	1114	2580	3360
III		3	40	367	1153	2080	3060
III		4	35	360	1121	2480	2940
III		5	40	297	1074	2220	3160
III		6	37	390	925	2940	3040
III		7	35	350	1235	2380	2900
III		8	38	329	1090	2520	3160
III		9	34	369	1231	2460	3120
III		10	38	362	1086	2780	2860
III	22	1	37	406	867	2640	3400
III		2	35	370	1178	2560	3320
III		3	38	350	1102	1980	3100
III		4	40	355	1104	2720	3160
III		5	35	340	1291	2280	2900
III		6	36	350	1197	2520	2480
III		7	38	380	1007	2720	3080
III		8	33	342	1237	2580	3300
III		9	41	250	1143	0	0
III		10	34	305	1299	0	0
III	23	1	39	358	1205	260	3200
III		2	39	351	1127	2620	3200
III		3	36	330	1037	2540	2620
III		4	33	337	1349	2420	3540
III		5	36	359	1001	2220	2620
III		6	37	397	1173	2620	2620
III		7	34	365	1152	2960	2880
III		8	42	350	1146	2580	3160
III		9	34	312	1105	2580	2820
III		10	36	329	972	2640	3120
III	24	1	33	215	1141	2640	3080
III		2	33	360	1105	2480	2820
III		3	37	273	1291	2600	3120
III		4	37	350	1254	2300	3240
III		5	37	329	1170	2460	3540
III		6	36	380	1093	2420	2340
III		7	40	303	1163	1860	3380
III		8	33	350	1056	2140	3160
III		9	36	316	1163	2260	2940
III		10	41	340	1044	2540	0
III	25	1	34	373	1192	2500	3040
III		2	36	330	1105	2400	3440
III		3	30	343	1291	2400	3020
III		4	36	375	1254	2620	3080
III		5	34	357	1170	2640	3120
III		6	37	340	1093	2420	2920
III		7	37	349	1163	2660	3340
III		8	32	370	1056	2480	3220
III		9	32	319	1163	2600	3020
III		10	36	185	1044	2760	3160
III	26	1	35	377	1243	2420	3120
III		2	37	345	1330	2440	2720
III		3	40	348	1136	2600	3140
III		4	34	381	1035	2860	2960
III		5	34	370	1174	2880	2420
III		6	39	347	1232	2800	2960
III		7	42	312	1052	2200	3580
III		8	38	305	986	2680	2540
III		9	39	404	1324	2880	3120
III		10	35	0	0	0	0
III	27	1	41	324	1260	2360	3420
III		2	34	370	1230	2540	3060
III		3	39	382	1190	2580	3100
III		4	36	327	1112	2700	3240
III		5	35	320	1091	2780	2720
III		6	35	353	1057	1900	2560
III		7	35	348	1049	2700	3440
III		8	39	365	871	2660	2560
III		9	33	366	1192	2520	2480
III		10	41	360	0	0	0
III	28	1	35	337	1246	2560	3120
III		2	39	372	971	2540	3140
III		3	34	378	987	2480	3220
III		4	35	335	1154	2640	3480
III		5	36	375	1243	2560	2920
III		6	35	379	1022	2100	3480
III		7	35	329	1106	2300	3240
III		8	39	324	1135	2340	2900
III		9	34	332	991	2760	2860
III		10	36	322	1196	2250	2880
III	29	1	37	385	1194	2260	3060
III		2	39	380	1035	2480	3280
III		3	34	360	1119	2420	2920
III		4	37	330	1175	2580	3140
III		5	33	300	1145	2840	3120
III		6	41	339	1150	2400	3160
III		7	40	355	1309	2620	3120
III		8	37	366	1066	2560	3280
III		9	32	327	1124	2600	3800
III		10	36	360	1243	2700	3120
III	30	1	36	332	1264	3520	3140
III		2	34	341	1105	2800	2820
III		3	33	323	1105	2600	3260
III		4	40	360	1115	2460	3230
III		5	36	330	1144	2280	2820
III		6	36	395	1245	2400	2940
III		7	35	355	1218	2320	3240
III		8	37	350	1211	2600	2660
III		9	35	377	1102	2320	3120
III		10	34	340	1054	2280	3180
IV	31	1	38	337	1234	2600	3360
IV		2	34	301	1140	2640	2520
IV		3	37	343	1034	2380	2920
IV		4	39	365	1214	2240	3280
IV		5	39	340	1056	2820	3160
IV		6	36	330	1204	2300	3060
IV		7	35	302	1066	2600	3400
IV		8	39	351	1023	2300	3220
IV		9	33	310	1029	2560	2880
IV		10	34	0	0	0	0
IV	32	1	39	381	1173	2720	2740
IV		2	35	329	1134	2600	3320
IV		3	39	403	1141	2660	3120
IV		4	35	327	1011	2920	3500
IV		5	39	358	1003	2660	2940
IV		6	34	285	1006	2160	2720
IV		7	36	314	1072	2420	3520
IV		8	36	369	1304	2320	3060
IV		9	37	361	1201	2180	3340
IV		10	34	363	1240	0	0
IV	33	1	33	351	1084	2720	2940
IV		2	42	337	1047	2540	3440
IV		3	38	401	1034	2780	3360
IV		4	37	366	1062	2700	3460
IV		5	36	341	1004	2800	2620
IV		6	34	333	1103	2520	2960
IV		7	38	370	1132	2220	3420
IV		8	37	380	1159	2160	3160
IV		9	39	371	971	2400	3460
IV		10	39	362	1219	2780	2960
IV	34	1	33	364	1021	2520	3200
IV		2	38	344	1251	2560	3040
IV		3	34	294	1039	2640	3000
IV		4	38	296	973	2560	3220
IV		5	33	344	1092	2380	3400
IV		6	34	353	914	2660	3020
IV		7	35	350	1186	2580	3000
IV		8	33	372	1062	2420	2620
IV		9	35	344	1072	2320	3000
IV		10	35	320	1203	2480	3080
IV	35	1	39	349	1234	2900	3080
IV		2	37	321	971	2600	2940
IV		3	41	326	1078	2540	3220
IV		4	36	359	1106	2860	3140
IV		5	37	303	610	2260	3520
IV		6	38	371	1065	2660	2920
IV		7	36	339	1035	2440	3500
IV		8	35	362	1093	0	0
IV		9	34	377	0	0	0
IV		10	40	0	0	0	0
IV	36	1	36	360	1243	2260	2360
IV		2	37	350	1005	2640	3080
IV		3	35	356	994	2160	3260
IV		4	37	281	915	2840	3320
IV		5	39	348	1134	2080	3180
IV		6	43	316	1174	2700	2660
IV		7	33	360	1134	2600	2980
IV		8	33	362	992	2560	3520
IV		9	37	366	1074	2520	0
IV		10	36	295	0	0	0
IV	37	1	37	340	1204	2640	2840
IV		2	38	365	1137	2360	2860
IV		3	34	391	1145	2460	3020
IV		4	35	400	1037	2640	3120
IV		5	37	347	1101	2120	2780
IV		6	35	362	1176	2500	3220
IV		7	37	325	1260	2640	3100
IV		8	35	351	1234	2520	3180
IV		9	38	378	1190	2280	3020
IV		10	38	340	1083	2680	3220
IV	38	1	36	335	1171	2660	3300
IV		2	35	339	1023	2380	3160
IV		3	39	355	1073	2720	3320
IV		4	35	354	1043	2560	3020
IV		5	36	372	1050	2460	3120
IV		6	38	350	1040	2520	3220
IV		7	36	343	997	2500	3360
IV		8	40	340	1186	2480	2960
IV		9	36	349	1050	2600	320
IV		10	38	357	1126	0	0
IV	39	1	40	255	973	1920	3160
IV		2	39	301	1103	2600	3020
IV		3	39	357	1018	2580	3040
IV		4	38	372	1023	2840	3240
IV		5	37	305	1104	2200	2760
IV		6	37	341	1023	2480	2620
IV		7	41	366	1041	2430	3020
IV		8	36	378	843	2460	3100
IV		9	38	357	983	2620	2780
IV		10	30	0	0	0	0
IV	40	1	36	350	743	2440	2580
IV		2	38	360	857	2460	2860
IV		3	41	321	1054	2320	2640
IV		4	35	348	999	2340	3160
IV		5	39	352	973	2220	2920
IV		6	36	347	1010	2480	2820
IV		7	39	328	3983	2160	2580
IV		8	36	347	1082	2240	3160
IV		9	36	334	1055	2340	2920
IV		10	35	339	1077	2500	0
V	41	1	39	356	1126	2400	2320
V		2	35	364	1132	2440	2920
V		3	39	331	1023	2500	3220
V		4	39	391	1104	2460	2700
V		5	37	350	1094	1960	3220
V		6	41	377	989	2480	3060
V		7	40	372	1039	2580	2800
V		8	37	335	1144	2440	2620
V		9	38	316	1133	2140	3020
V		10	36	371	1041	2500	0
V	42	1	34	281	1031	2180	2920
V		2	37	330	1104	2820	2840
V		3	32	287	975	2420	3200
V		4	36	320	926	2200	3460
V		5	36	345	971	2480	3220
V		6	36	353	1194	2380	3000
V		7	38	280	1171	1980	2520
V		8	37	305	953	2360	3160
V		9	36	330	973	2360	2800
V		10	32	296	929	2180	0
V	43	1	35	389	1016	2360	2900
V		2	36	342	1040	2460	2520
V		3	39	326	970	2600	2740
V		4	31	331	1041	2240	2960
V		5	37	336	1032	2680	2940
V		6	39	306	1133	2380	2660
V		7	37	325	1135	2440	3020
V		8	34	370	1073	2820	3100
V		9	39	356	1061	2440	3240
V		10	40	0	0	0	0
V	44	1	40	318	867	2280	2920
V		2	39	315	940	2680	2180
V		3	33	350	1053	2320	2920
V		4	37	367	1031	2380	3420
V		5	36	306	1142	2200	3220
V		6	39	316	1232	2360	2620
V		7	39	391	973	2580	2860
V		8	36	410	1032	2640	3120
V		9	33	360	908	2600	3020
V		10	32	352	1023	0	0
V	45	1	41	335	1002	2600	2820
V		2	36	327	796	2640	3240
V		3	38	337	992	2390	3200
V		4	36	350	1005	2620	2540
V		5	41	372	1153	2680	3180
V		6	35	349	837	2220	3420
V		7	37	320	1033	2320	3240
V		8	37	360	993	2080	3220
V		9	41	362	1070	2680	2620
V		10	37	316	994	1960	2220
V	46	1	40	375	834	2500	3080
V		2	38	380	1121	2540	2920
V		3	37	341	1140	2300	2460
V		4	36	342	960	2780	2800
V		5	36	367	1004	2560	3080
V		6	36	356	926	2580	3000
V		7	38	343	963	2420	2680
V		8	39	366	1004	2680	3040
V		9	33	285	1021	2420	3100
V		10	39	357	804	1920	2900
V	47	1	35	295	1105	2260	3120
V		2	34	289	969	1960	3360
V		3	38	281	914	2280	2700
V		4	33	299	1094	1300	2440
V		5	36	304	1019	2460	2880
V		6	35	274	1003	2280	2840
V		7	36	262	864	2300	2640
V		8	40	275	902	2360	2920
V		9	38	290	1071	2620	2720
V		10	39	218	994	2540	2560
V	48	1	34	390	1003	2620	2420
V		2	38	330	937	2100	3060
V		3	34	361	1022	2760	3120
V		4	36	344	1022	2400	2360
V		5	36	331	1011	1880	3000
V		6	38	340	1172	240	2940
V		7	37	295	1002	250	2660
V		8	34	293	907	2280	3240
V		9	39	320	1137	2040	2900
V		10	35	349	1234	2560	2880
V	49	1	39	370	1170	2140	2560
V		2	35	295	1194	2360	2640
V		3	35	231	922	2620	2960
V		4	40	348	962	2500	2380
V		5	36	323	1052	2400	2700
V		6	43	330	997	2100	3340
V		7	34	262	873	2260	2600
V		8	38	374	1023	1980	3420
V		9	39	332	1103	2760	2980
V		10	35	376	1159	2700	2480
V	50	1	36	369	925	2540	3280
V		2	32	312	776	2020	2600
V		3	36	299	1034	2540	3120
V		4	38	331	834	2020	2720
V		5	37	292	1155	2480	2520
V		6	35	343	971	2600	2360
V		7	38	324	999	2400	3100
V		8	37	297	1061	2000	3000
V		9	35	350	1024	2180	2840
V		10	36	266	934	2560	3120
